# Supplementary material for: Functional Aging in Male C57BL/6J Mice Across the Life-Span: A Systematic Behavioral Analysis of Motor, Emotional, and Memory Function to Define an Aging Phenotype
Source: Frontiers journal article supplement (doi:10.3389/fnagi.2021.697621), 2021-08-02
Supplement: Table_1.PDF [file Table_1.PDF]

**Supplemental Table. Summary of statistical analyses**

| Analysis / Task                                                          | Statistical value                |
|--------------------------------------------------------------------------|----------------------------------|
| General physical conditions                                              |                                  |
| Body weight *                                                            | F (4, 112) = 57.963, p < 0.001   |
| Food intake *                                                            | F (4, 112) = 0.319, p = 0.865    |
| Water intake *                                                           | F (4, 112) = 1.666, p = 0.163    |
| Physical activity                                                        |                                  |
| Distance traveled (Open field test) **                                   |                                  |
| main effect of age                                                       | F (4, 112) = 14.348, p < 0.001   |
| main effect of light condition                                           | F (1, 112) = 2202.846, p < 0.001 |
| interaction (age x light condition)                                      | F (4, 112) = 3.924, p = 0.005    |
| Number of rearings (Open field test) **                                  |                                  |
| main effect of age                                                       | F (4, 112) = 10.765, p < 0.001   |
| main effect of light condition                                           | F (1, 112) = 28.711, p < 0.001   |
| interaction (age x light condition)                                      | F (4, 112) = 1.327, p = 0.264    |
| Distance traveled (Home-cage activity) *                                 | F (4, 112) = 14.418, p < 0.001   |
| Gait speed                                                               |                                  |
| Maximum gait speed (Rotarod test) *                                      | F (4, 112) = 21.325, p < 0.001   |
| Grip strength                                                            |                                  |
| Wire hanging test *                                                      | F (4, 112) = 21.104, p < 0.001   |
| Anxiety                                                                  |                                  |
| Peripheral time (Open field test) **                                     |                                  |
| main effect of age                                                       | F (4, 112) = 3.460, p = 0.01     |
| main effect of light condition                                           | F (1, 112) = 24.203, p < 0.001   |
| interaction (age x light condition)                                      | F (4, 112) = 2.988, p = 0.022    |
| Immobile time (Open field test) **                                       |                                  |
| main effect of age                                                       | F (4, 112) = 10.893, p < 0.001   |
| main effect of light condition                                           | F (1, 112) = 398.069, p < 0.001  |
| interaction (age x light condition)                                      | F (4, 112) = 3.299, p = 0.014    |
| Immobile time (Marble burying test) *                                    | F (4, 112) = 18.502, p < 0.001   |
| Number of marbles buried (Marble burying test) *                         | F (4, 112) = 17.809, p < 0.001   |
| Memory                                                                   |                                  |
| Escape latency (Spatial acquisition test, Barnes hole board task) **     |                                  |
| main effect of age                                                       | F (4, 112) = 3.252, p = 0.015    |
| main effect of training block                                            | F (3, 336) = 219.725, p < 0.001  |
| interaction (age x training block)                                       | F (12, 336) = 1.880, p = 0.036   |
| Escape distance (Spatial acquisition test, Barnes hole board task) **    |                                  |
| main effect of age                                                       | F (4, 112) = 6.403, p < 0.001    |
| main effect of training block                                            | F (3, 336) = 180.888, p < 0.001  |
| interaction (age x training block)                                       | F (12, 336) = 2.631, p = 0.002   |
| Quadrant time (Probe test, Barnes hole board task) *                     | F (4, 112) = 4.458, p = 0.002    |
| Number of nosepokes (Probe test, Barnes hole board task) *               | F (4, 112) = 11.092, p < 0.001   |
| Escape latency (Spatial acquisition training, Morris water maze task) ** |                                  |
| main effect of age                                                       | F (4, 112) = 8.614, p < 0.001    |
| main effect of training block                                            | F (9, 1008) = 68.959, p < 0.001  |
| interaction (age x training block)                                       | F (36, 1008) = 0.922, p = 0.602  |
| Swim distance (Spatial acquisition training, Morris water maze task) **  |                                  |

|                                                                          |                                  |
|--------------------------------------------------------------------------|----------------------------------|
| main effect of age                                                       | F (4, 112) = 4.582, p = 0.002    |
| main effect of training block                                            | F (9, 1008) = 71.682, p < 0.001  |
| interaction (age x training block)                                       | F (36, 1008) = 1.148, p = 0.254  |
| Quadrant time (Probe test, Morris water maze task) *                     | F (4, 112) = 1.681, p = 0.159    |
| Platform crossing (Probe test, Morris water maze task) *                 | F (4, 112) = 4.329, p = 0.003    |
| Escape latency (Cued training, Morris water maze task) **                |                                  |
| main effect of age                                                       | F (4, 112) = 4.934, p < 0.001    |
| main effect of training day                                              | F (3, 336) = 137.685, p < 0.001  |
| interaction (age x training day)                                         | F (12, 336) = 0.986, p = 0.462   |
| Escape distance (Cued training, Morris water maze task) **               |                                  |
| main effect of age                                                       | F (4, 112) = 1.768, p = 0.140    |
| main effect of training day                                              | F (3, 336) = 45.203, p < 0.001   |
| interaction (age x training day)                                         | F (12, 336) = 1.223, p = 0.266   |
| Swim speed (Morris water maze task) *                                    |                                  |
| Spatial acquisition training                                             | F (4, 112) = 6.814, p < 0.001    |
| Probe test                                                               | F (4, 112) = 19.514, p < 0.001   |
| Cued training                                                            | F (4, 112) = 13.617, p < 0.001   |
| Fear conditioning task *                                                 |                                  |
| Pre-Cue (1 hr)                                                           | F (4, 112) = 6.967, p < 0.001    |
| Cue-dependent memory test (1 hr)                                         | F (4, 112) = 3.905, p = 0.005    |
| Pre-Cue (24 hrs)                                                         | F (4, 112) = 10.005, p < 0.001   |
| Cue-dependent memory test (24 hrs)                                       | F (4, 112) = 1.514, p = 0.203    |
| Context-dependent memory test (48 hrs)                                   | F (4, 112) = 16.503, p < 0.001   |
| Pain sensation                                                           |                                  |
| Electrical footshock sensitivity test *                                  |                                  |
| Pawlick                                                                  | F (4, 112) = 3.309, p = 0.013    |
| Vocalization                                                             | F (4, 112) = 2.820, p = 0.028    |
| Hotplate test *                                                          | F (4, 112) = 0.809, p = 0.522    |
| Spatial memory retention                                                 |                                  |
| Escape latency (Spatial acquisition training, Morris water maze task) ** |                                  |
| main effect of age                                                       | F (4, 205) = 15.431, p < 0.001   |
| main effect of training block                                            | F (9, 1845) = 121.269, p < 0.001 |
| interaction (age x training block)                                       | F (36, 1845) = 1.107, p = 0.305  |
| Swim distance (Spatial acquisition training, Morris water maze task) **  |                                  |
| main effect of age                                                       | F (4, 205) = 6.743, p < 0.001    |
| main effect of training block                                            | F (9, 1845) = 131.239, p < 0.001 |
| interaction (age x training block)                                       | F (36, 1845) = 1.111, p = 0.300  |
| Platform crossing (Probe test, Morris water maze task) **                |                                  |
| main effect of age                                                       | F (4, 195) = 4.324, p = 0.002    |
| main effect of retention days                                            | F (2, 195) = 6.895, p < 0.001    |
| interaction (age x retention days)                                       | F (8, 195) = 0.941, p = 0.484    |
| Quadrant time (Probe test, Morris water maze task) **                    |                                  |
| main effect of age                                                       | F (4, 195) = 0.741, p = 0.565    |
| main effect of retention days                                            | F (2, 195) = 13.188, p < 0.001   |
| interaction (age x retention days)                                       | F (8, 195) = 1.198, p = 0.302    |

\* One-way ANOVA

\*\* Two-way ANOVA
